# Supplementary material
Source: Springer Nature journal article supplement (https://www.springermedizin.de/resource/supplementary/12984_2010_250_MOESM6_ESM.pdf/9605632)

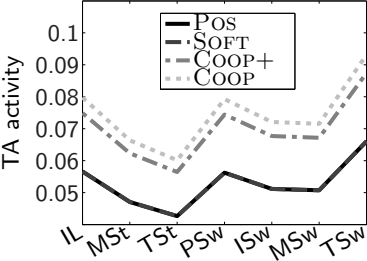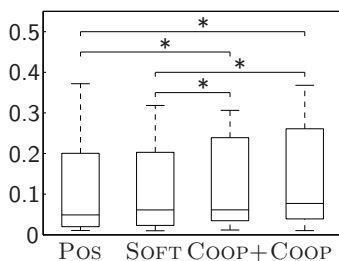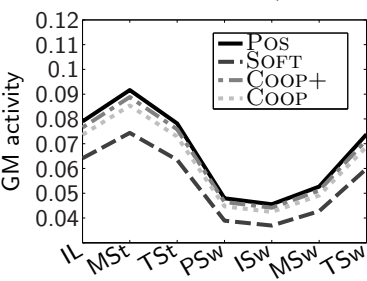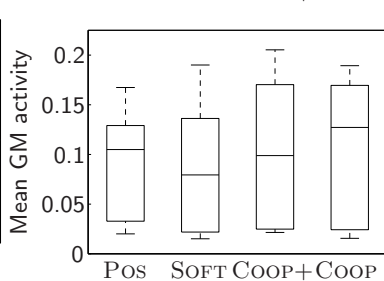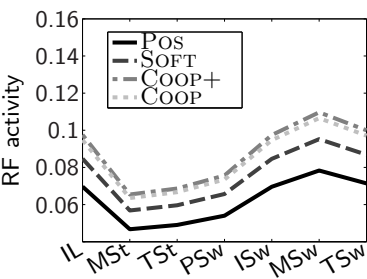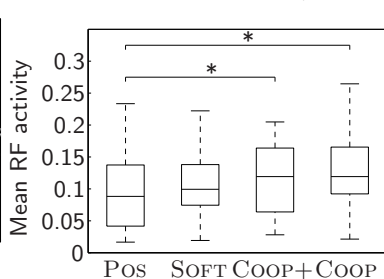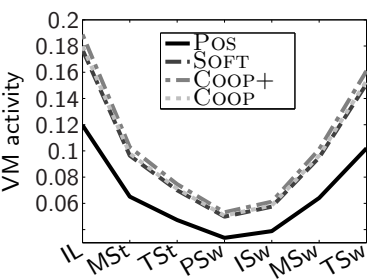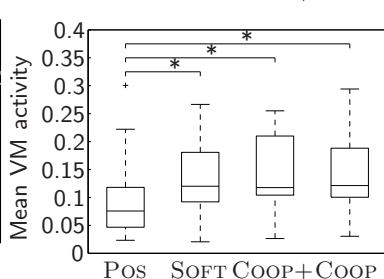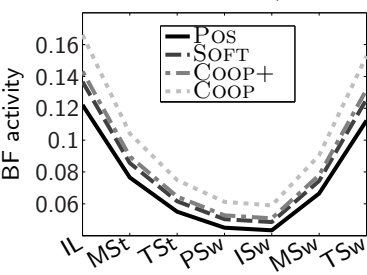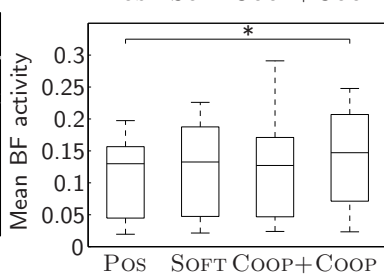

Supplement: MOESM6 [file 9605632]
